# Supplementary material
Source: PubMed Central journal article supplement (PMC3031481)

## **RNA extraction and gene expression analysis**

RNA was extracted from lymph node and lungs using Trizol and after DNase digestion cleaned up using RNeasy minikit (Qiagen). One microgram of RNA was reverse transcribed using RT<sup>2</sup> First Strand Kit and ran on Th17 and autoimmunity plates (SABiosciences). Data were interpreted by using SABiosciences data analysis tool and Statminer.

**Table S1. Analysis of leukocyte populations in blood of IL-22R1 tg mice**

| <b>Parameters</b> | <b>Results</b> | <b>Normal Range</b> | <b>Remarks</b> |
|-------------------|----------------|---------------------|----------------|
| WBC <sup>a</sup>  | <b>13.12</b>   | 1.8-10.7            | Leukocytosis   |
| Neutrophils       | <b>7.24</b>    | 0.1-2.4             | Neutrophilia   |
| Lymphocytes       | 3.94           | 0.9-9.3             | Normal         |
| Monocytes         | <b>0.88</b>    | 0.0-0.4             | Monocytosis    |
| Eosinophils       | 0.25           | 0.0-0.2             | Eosinophilia   |
| Basophils         | 0.25           | 0.0-0.2             | Basophilia     |

<sup>a</sup>Values are expressed as 10<sup>3</sup> cells/ul.

**Table S2. Analysis of leukocyte populations in blood of IL-22R1 tg bone marrow recipients**

| animal            | NE          | LY          | MO          | EO         | BA         |
|-------------------|-------------|-------------|-------------|------------|------------|
| <b>wt &gt; wt</b> | 26.84± 1.20 | 66.19± 0.19 | 5.37± 1.72  | 1.12± 1.22 | 0.48± 0.75 |
| <b>tg &gt; wt</b> | 54.36± 3.87 | 32.23± 5.39 | 12.37± 7.19 | 1.02± 0.45 | 0.03± 0.02 |

**Figure S1. Gene expression profile of inflammatory genes in lymph node.** (a) Heat map comparison of gene expression between wt > wt and tg > wt animals (b) heat map showing correlation across biological groups (c) Volcano plot showing changes in gene expression, the green and red dots above the blue line represent fold change in gene expression which are statistically significant. Fold change of genes over (d) and under (e) expressed which are statistically significant. The data represented are biological triplicates from each group.

**Figure S2. Thymic involution and changes in T-cell profiles in thymus and lymph nodes in IL-22R1 tg mice** (a) Thymocyte profile was analyzed after gating on CD4 and CD8 cells. (b) Percentages are shown for DN (CD4<sup>-</sup>CD8<sup>-</sup>), DP (CD4<sup>+</sup>CD8<sup>+</sup>), CD4 SP and CD8 SP cells. (c) The DN population was further distinguished based on the CD25<sup>+</sup> and CD44<sup>+</sup> to distinguish between DN1, DN2, DN3 and DN4. (d) Percentages are shown for DN1-4 cells. (e) Lymph node T-cell profile was analyzed after gating on CD4 and CD8 cells. (f) Percentages are shown for CD4 SP and CD8 SP cells. Representative data from one experiment with three animals per group which is shown as mean ± SEM. \*  $p < 0.05$ , \*\*  $p < 0.01$ , \*\*\*  $p < 0.001$ .

**Figure S3. The graph shows percentage of neutrophils (FSC<sup>hi</sup>F4/80<sup>lo</sup>) in blood measured by flow cytometry during weeks 4, 5 and 6 in wt > wt and tg > wt animals.**

**Figure S4. Gene expression profile of inflammatory genes in lungs.** (a) Heat map comparison of gene expression between wt > wt and tg > wt animals. Fold change of genes over (b) and under (c) expressed.

**Figure S5. Patient who had elevated IL-22 in serum 3 months post EPOCH treatment was assayed for IL-22 for 6, 9 and 12 months post treatment.**

**Figure S6. Cytokine levels in DLBCL patients.** (a) Cytometric bead array to assay the concentrations of IFN- $\gamma$ , IL-17A, IL-8, IL-22, IL-6 and TNF- $\alpha$  in of DLBCL serum patients pre treatment. (b) Comparison of IL-17A and IL-22 of ALCL and DLBCL pre-treatment serum samples.

# Figure S1

a)

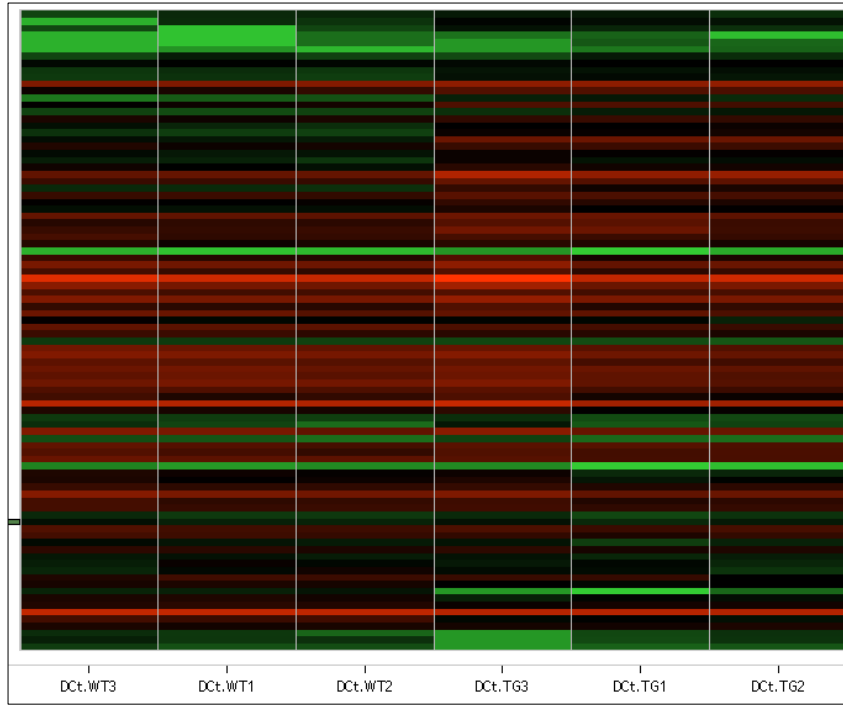

b)

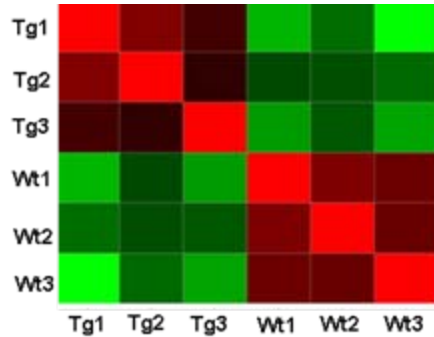

c)

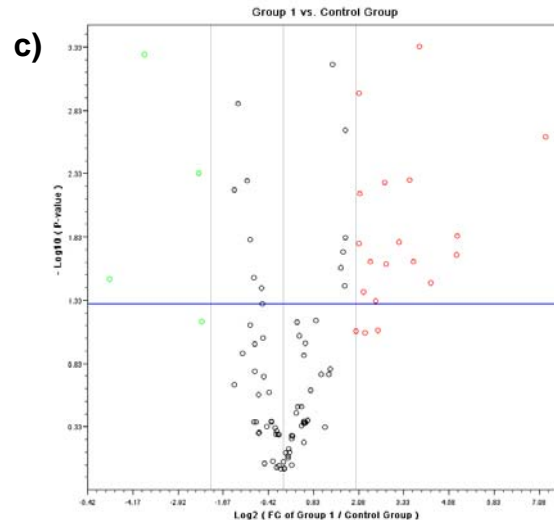

d) Genes over expressed

| Gene     | Fold Change | p-value  |
|----------|-------------|----------|
| IFN-8    | 153.0437    | 0.002381 |
| Cxcl2    | 27.8563     | 0.014374 |
| Csf3     | 27.4398     | 0.020321 |
| IL-12rb2 | 16.8791     | 0.034073 |
| IL-22    | 13.6608     | 0.000457 |
| Mmp13    | 12.0989     | 0.023027 |
| IL-1b    | 11.1876     | 0.005196 |
| Cebpb    | 9.166       | 0.01608  |
| IL-6     | 7.1331      | 0.024045 |
| Mmp3     | 6.9768      | 0.005411 |
| IL-12rb1 | 6.0929      | 0.080281 |
| IL-27    | 5.8784      | 0.04742  |
| Cxcl1    | 5.3284      | 0.02297  |
| Ccl7     | 4.7715      | 0.083585 |
| Csf2     | 4.6741      | 0.039799 |
| Clec7a   | 4.3206      | 0.006697 |
| Socs3    | 4.2612      | 0.016467 |
| IL-10    | 4.2343      | 0.001079 |
| Ccl2     | 4.0474      | 0.081941 |

e) Genes under expressed

| Gene    | Fold Change | p-value  |
|---------|-------------|----------|
| IL-4    | -28.1052    | 0.031564 |
| Ccl22   | -14.3724    | 0.000531 |
| Cd40lg  | -5.0414     | 0.004595 |
| IL-17rb | -4.7655     | 0.067818 |

Figure S2

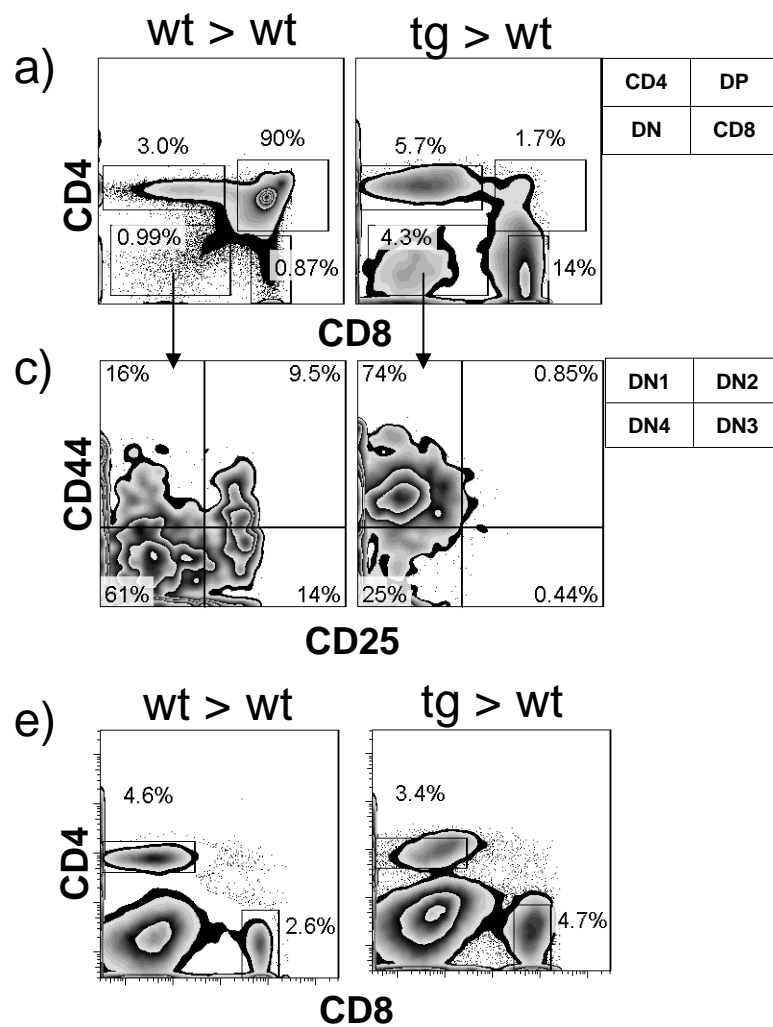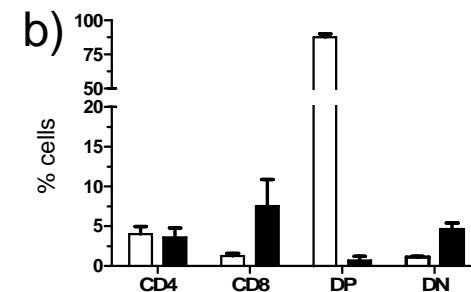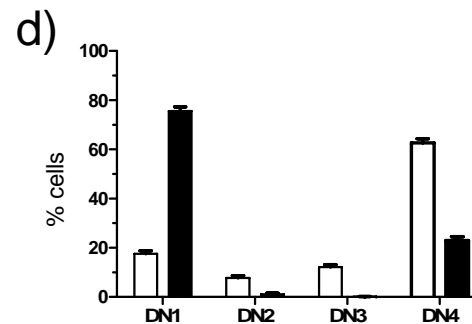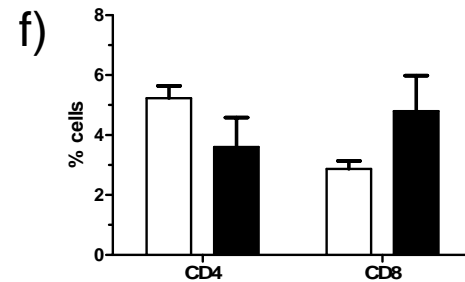

□ wt > wt    ■ tg > wt

Figure S3

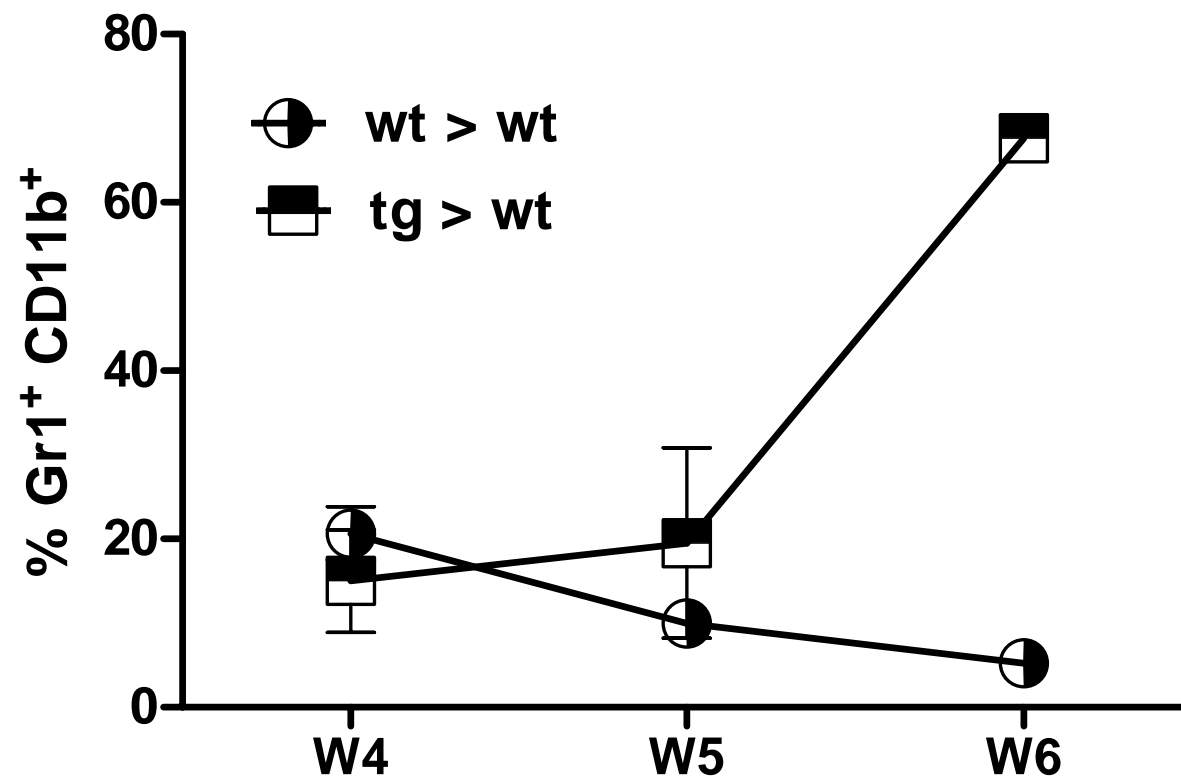

# Figure S4

## a) Heatmap

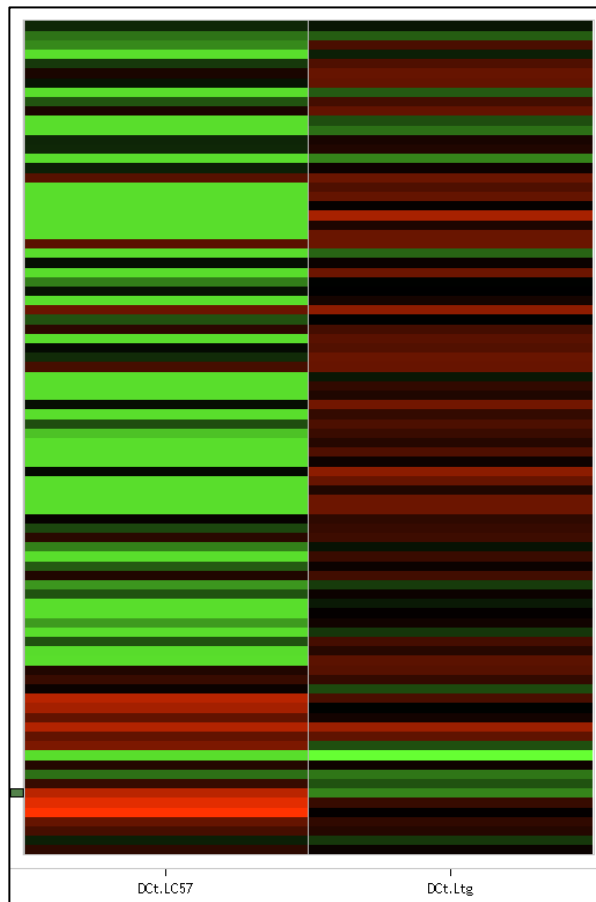

## b) Genes upregulated

| Detector     | Log10 RQ    | Detector      | Log10 RQ    |
|--------------|-------------|---------------|-------------|
| CD3g         | 5.442065416 | IL-12rb1      | 2.762808146 |
| <b>IFN-g</b> | 5.439988309 | Ccl20         | 2.535891735 |
| CD3d         | 5.43568358  | IL-6ra        | 2.5104547   |
| S1pr1        | 5.386766206 | Stat6         | 2.483964061 |
| IL-1b        | 5.15638795  | Icam1         | 2.44913489  |
| CD3e         | 5.128994221 | Ccl2          | 2.435076789 |
| Nfkb1        | 4.961079689 | <b>IL-17f</b> | 2.389591157 |
| ICOS         | 4.960628144 | Socs1         | 2.233627516 |
| <b>IL-18</b> | 4.598489059 | IL-4          | 2.167611638 |
| CD28         | 4.501075753 | Ccl7          | 2.132361026 |
| Traf6        | 4.469256882 | IL-12rb2      | 2.041811203 |
| <b>Stat3</b> | 4.284304053 | Nfatc2        | 2.040998422 |
| Mmp9         | 4.248782513 | IL-3          | 2.014869018 |
| Cxcl2        | 4.198149268 | CD8a          | 1.933109272 |
| <b>IL-10</b> | 4.178010361 | IL-13         | 1.824377237 |
| <b>TNF</b>   | 4.140742848 | <b>IL-22</b>  | 1.810499754 |
| Myd88        | 4.12310249  | Ccl22         | 1.674163269 |
| <b>Csf2</b>  | 4.020752292 | Syk           | 1.565310823 |
| IL-27        | 3.893296191 | CD34          | 1.546044903 |
| Tlr4         | 3.768790185 | CSF3          | 1.489330852 |
| <b>IL-6</b>  | 3.733690088 | <b>IL-17a</b> | 1.485146535 |
| TGF-b1       | 3.488501156 | <b>Cxcl1</b>  | 1.339718944 |
| Ccl1         | 3.271759559 | CD2           | 1.244111818 |
| IL-21        | 3.237562552 | CD247         | 1.189354461 |
| IL-2         | 3.142617691 | Clec7a        | 1.177855116 |
| Tbx21        | 2.842611198 | CD4           | 1.019874574 |

## c) Genes downregulated

| Detector | Log10 RQ  |
|----------|-----------|
| IL-17d   | -5.239442 |
| Rorc     | -4.110941 |
| IL-5     | -3.346355 |
| Tirap    | -2.827891 |
| Mmp13    | -2.73123  |
| IL-23a   | -2.255663 |
| Jak2     | -1.817423 |
| IL-17rb  | -1.421178 |
| Gata3    | -1.295528 |

Figure S5

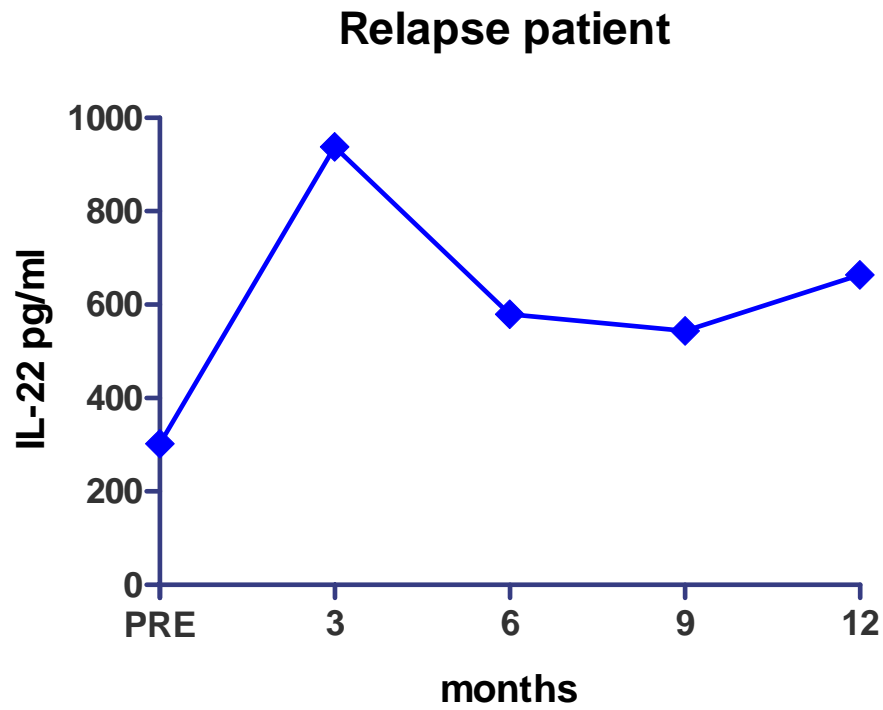

Supplement: blood-2010-05-285908_1.pdf [file blood-2010-05-285908_1.pdf]
